# Supplementary material for: Evidence-Based View of Safety and Effectiveness of Prokineticin Receptors Antagonists during Pregnancy
Source: Biomedicines. 2021 Mar 17;9(3):309. doi: 10.3390/biomedicines9030309 (PMC8002561; doi:10.3390/biomedicines9030309)
Supplement: Supplementary file 1 [file biomedicines-09-00309-s001.pdf]

# Evidence-Based View of Safety and Effectiveness of Prokineticin Receptors Antagonists during Pregnancy

Deborah Reynaud, Frederic Sergent, Roland Abi Nahed, Wael Traboulsi, Constance Collet, Christel Marquette, Pascale Hoffmann, Gianfranco Balboni, Qun-Yong Zhou, Padma Murthi, Mohamed Benharouga

Figure S1: Effects of prokineticin antagonists' PC7+PKRA on gestation outcomes

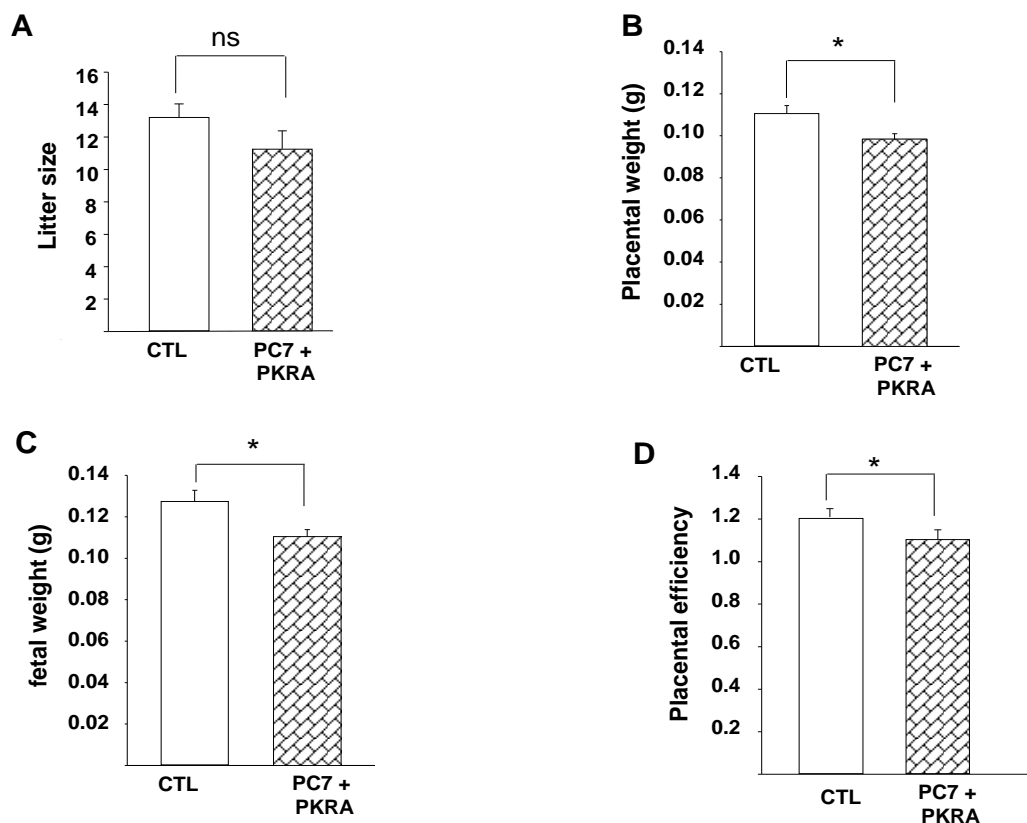

**Figure S1.** Effects of prokineticin antagonists' PC7+PKRA on gestation outcomes Panel B reports a graph that compares litter size of gravid mice treated or not with PC7+PKRA antagonists . Panel E & F report graphs that compare placenta and fetal weights of pups born from mother treated or not by PC7+PKRA, respectively. Panel D reports graph that compare placental efficiency of mice treated or not by PC7 or PKRA. Data are presented as mean  $\pm$  SEM. \*  $p < 0.05$ , bars with different letters are significantly different from each other.

**Figure S2:** Effects of combination concomitant treatment by prokineticin antagonists' on the placenta proliferation, vascularization and structure.

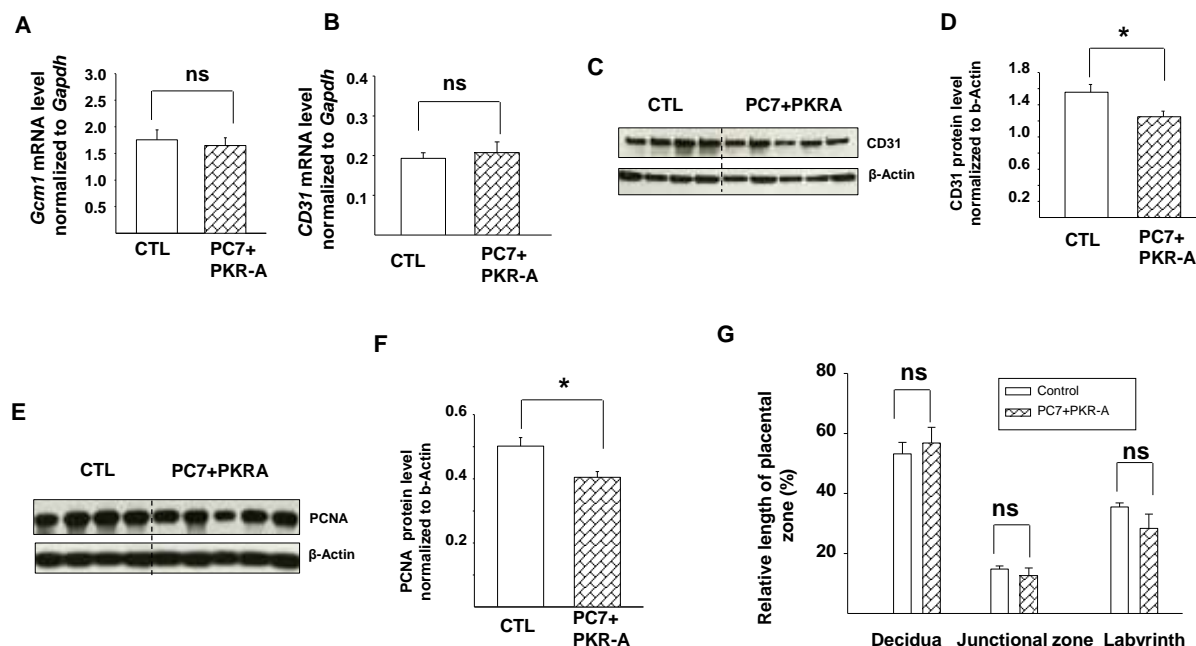

**Figure S2.** Effects of combined treatment by prokineticin antagonists' on the placenta proliferation and vascularization. **Panel A & B** depict comparisons of *Gcm1* and *Cd31* mRNA levels, respectively in placentas of CTL; PC7+PKRA. GAPDH was used to standardize for mRNA expression Data are represented as mean  $\pm$  SEM. ns = not significant, \* $P < 0.05$ . **Panel C & D** show Western blot analysis and quantification of CD31 protein levels in the placenta collected from CTL, PC7+PKRA treated mice. Standardization of immunoreactivity was performed using antibodies against  $\beta$ -actin.. **Panel E** show Western blot analysis and quantification of PCNA protein levels in the placenta collected from CTL and PC7+PKRA treated mice, **Panel F.** Standardization of immunoreactivity was performed using antibodies against  $\beta$ -actin. Data are represented as mean  $\pm$  SEM. \*  $p < 0.05$ , ns = not significant. **Panel G** depicts analysis of the placental zones of CTL and PC7+PKRA placentas. For each group, three placental sections/animal were analyzed. The graph shows proportions of the surface layer of 3 zones of the placenta (labyrinth, junctional zone, and decidua). Surfaces of the 3 layers were measured on parasagittal sections for each placenta. Mean values were used to calculate the mean surface proportion of the layers. Data are represented as mean  $\pm$  SEM. \*  $p < 0.05$ , ns = not significant.

**Figure S3:** Effect of combination treatment by prokineticin antagonists' on trophoblasts invasion and differentiation.

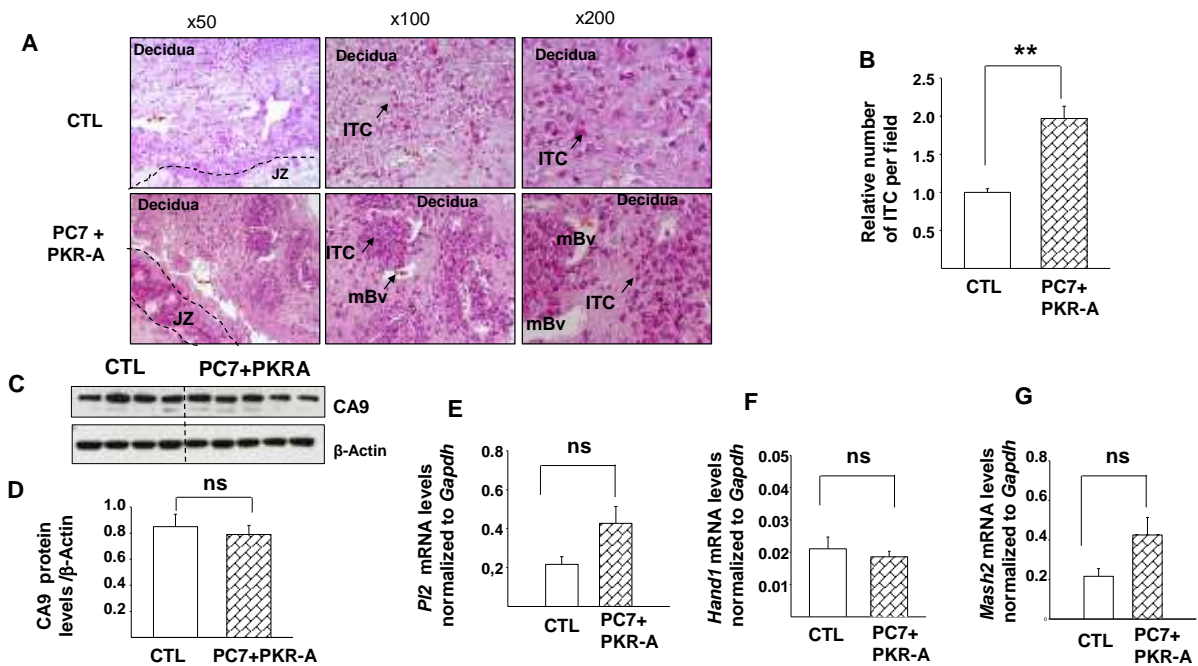

**Figure S3. Effect of combined treatment by prokineticin antagonists' on trophoblasts invasion and differentiation.** Panel A shows representative microphotographs of placental sections stained with Peroxide Acid Schiff at different magnifications. Placentas were collected from CTL, and PC7+PKRA treated mice at 12.5 dpc. JZ: Junctional Zone; ITC: Invasive Trophoblast Cell; mBv: Maternal Blood Vessel. Panel B depicts a graph that compares the number glycogenic cells in the maternal decidua. Panel C & Panel D show western blot analysis and quantification of CA9 protein levels in the placenta collected from CTL and PC7+PKRA treated mice. Standardization of immunoreactivity was performed using antibodies against  $\beta$ -actin. Panels E, F & G depict comparisons of Placental lactogen, 2 Hand1 and Mash2 nd mRNA levels, respectively in placentas of CTL, PC7+PKRA. GAPDH was used to standardize for mRNA expression Data are represented as mean  $\pm$  SEM. ns = not significant, \*  $p < 0.05$ .
